7. Kaplan AP, Beaven MA: *In vivo* studies of the pathogenesis of cold urticaria, cholinergic urticaria and vibration-induced swelling. *J Invest Dermatol* 67:327-332, 1976
8. Kaplan AP, Gray K, Shaff RE, Horakova Z, Beaven MA: *In vivo* studies of mediator release in cold urticaria and cholinergic urticaria. *J Allergy Clin Immunol* 55:394-402, 1975
9. Atkins PC, Rosenblum F, Dunsky EH, Coffey R, Zweiman B: Comparison of plasma histamine and cyclic nucleotides after antigen and methacholine inhalation in man. *J Allergy Clin Immunol* 66:478-485, 1980
10. Smith PL, Kagey-Sobotka A, Bleecker ER, et al: Physiologic man-

Anesthesiology  
57:425, 1982

*In reply:*—We have read with interest the letter by Hirshman *et al.*, and are frankly somewhat puzzled by the point they are attempting to make.

We are criticized specifically for suggesting a relationship between histamine release and cardiovascular effects. To bolster their argument they inappropriately refer to data we published concerning an anaphylactoid reaction following succinylcholine which did not involve significant hypotension.<sup>1</sup> If they would care to re-read the article, they will note that 1,500 ml of lactated Ringer's solution was infused rapidly to avoid hypotension. Nonetheless, there was a rapid and profound decrease in SVR.

The relationship between histamine release, not involving anaphylaxis, and decrease in SVR is certainly significant, as we and others have reported.<sup>2-5</sup> We agree that our correlation<sup>2</sup> taken as an isolated report does not necessarily imply causation. However, when the effect on SVR can be prevented by histamine antagonists as we reported,<sup>6</sup> it seems reasonable and prudent to conclude a causal relationship exists. We agree that this technique is far from perfect, but it is the classic and universally accepted method of determining causality.

The histamine antagonists had no significant effect on SVR. Furthermore, when heart rate is not affected, comparable results are obtained.<sup>7</sup> We have also obtained the same results when chlorpheniramine is substituted for diphenhydramine and there is no increase in heart rate. The suggestion about atropine borders on the ludicrous.

It appears that Hirshman *et al.* accept that morphine can decrease SVR, that morphine can cause histamine release, and that histamine can cause a decrease in SVR. We have demonstrated that histamine antagonists pre-

Anesthesiology  
57:425-426, 1982

*In reply:*—I have several comments to make in response to the letter by Hirshman, Downes, and Butler.

I agree with the authors about the need for more evidence, but in reference to my editorial,<sup>1</sup> I take exception to their comment: "we are unable to determine

ifestions of human anaphylaxis. *J Clin Invest* 66:1072-1080, 1980

11. Fahmy NR: Hemodynamics, plasma histamine, and catecholamine concentrations during an anaphylactoid reaction to morphine. *ANESTHESIOLOGY* 55:329-331, 1981
12. Moss J, Fahmy NR, Sunder N, Beaven MA: Hormonal and hemodynamic profile of an anaphylactic reaction in man. *Circulation* 63:210-213, 1981
13. Philbin DM, Moss J, Akins CW, et al: The use of H<sub>1</sub> and H<sub>2</sub> histamine antagonists with morphine anesthesia: A double-blind study. *ANESTHESIOLOGY* 55:292-296, 1981

(Accepted for publication May 10, 1982.)

vent much of the decrease in SVR associated with morphine as well as other histamine-releasing drugs.

We appear to have a webbed and billed bird that quacks. It might be a canary in disguise, but it seems more realistic to call it a duck.

DANIEL M. PHILBIN, M.D.

JONATHAN MOSS, M.D., PH.D.

CARL E. ROSOW, M.D., PH.D.

JOHN J. SAVARESE, M.D.

*Department of Anesthesia  
Massachusetts General Hospital  
Boston, Massachusetts 02114*

#### REFERENCES

1. Moss J, Fahmy NR, Sunder N, Beavan M: Hormonal and hemodynamic profile of an anaphylactic reaction in man. *Circulation* 63:210-213, 1981
2. Rosow CE, Moss J, Philbin DM, Savarese JJ: Histamine release during morphine and fentanyl anesthesia. *ANESTHESIOLOGY* 56:93-96, 1982
3. Lorenz W: Histamine release in man. *Agents Actions* 5:402-416, 1975
4. Lorenz W, Doenicke A, Schonig B, Neugebauer E: The role of histamine in adverse reactions to intravenous agents, *Adverse Reactions of Anesthetic Drugs*. Edited by Thornton JA. New York, Excerpta Medica, 1981, pp 169-238
5. Beavan MA: Histamine: Its role in physiological and pathological processes. *Monogr Allergy* 13:1-114, 1978
6. Philbin DM, Moss J, Akins CW, et al: The use of H<sub>1</sub> and H<sub>2</sub> histamine antagonists with morphine anesthesia: A double-blind study. *ANESTHESIOLOGY* 55:292-296, 1981
7. Johnston WE, Moss J, Philbin DM, et al: Management of cold urticaria during hypothermic cardiopulmonary bypass. *N Engl J Med* 306:219-221, 1982

(Accepted for publication May 10, 1982.)

the patient population underlying this statement since all 3 references refer to the same patient." One of the references was to Lorenz and associates,<sup>2</sup> who have carefully documented eight cases of drug-induced reactions associated with histamine release. My monograph<sup>3</sup> in-
